# Supplementary material
Source: Springer Nature journal article supplement (https://www.springermedizin.de/resource/supplementary/12888_2008_538_MOESM4_ESM.pdf/9483550)
Supplement: MOESM4 [file 9483550]

**A****G72 genomic region (Chr13: 104916217–104941383)**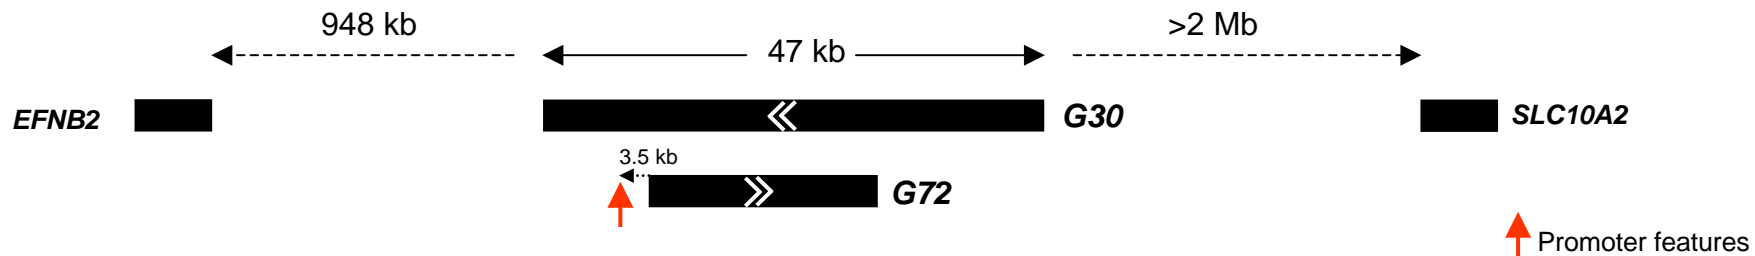**B****G72 mRNA (Chr13: 104916217–104941383)**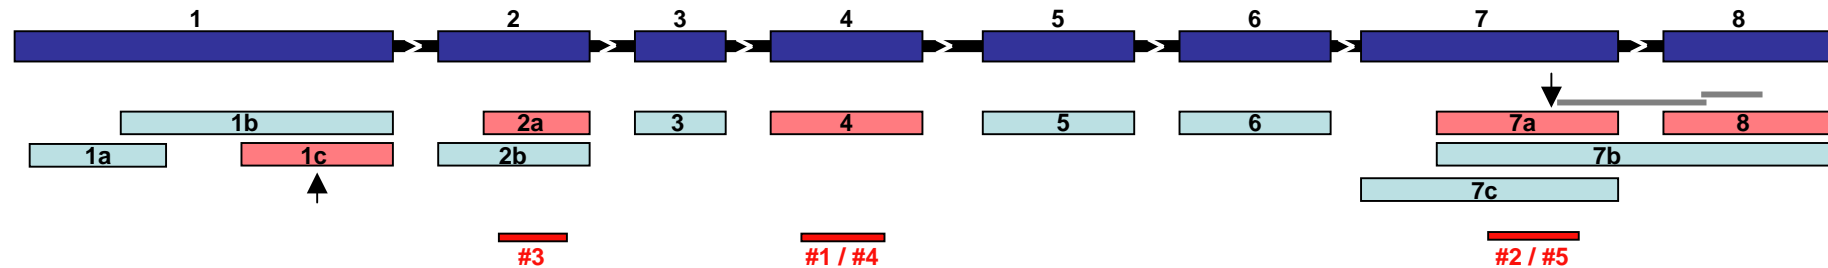

AY138546 exons

mRNA exons

G72 Taqman &amp; SYBR Green primers

AY138546 Coding Start ↑ / Stop ↓ site

Predicted miRNAs
